# Supplementary material for: Rat model of smoke inhalation-induced acute lung injury
Source: HighWire-hosted journal article supplement (doi:10.1136/bmjresp-2021-000879), 2021-07-01
Supplement: bmjresp-2021-000879supp001_data_supplement.pdf [file bmjresp-2021-000879supp001_data_supplement.pdf]

**Table S1: Characteristics of Douglas fir compressed wood pellet smoke in CWCFS<sup>a</sup> smoke chamber and in the SHAM microisolater<sup>b</sup>**

| Characteristics (unit)                                | Inside smoke chamber <sup>c</sup> | Outside smoke chamber <sup>c</sup> | Inside microisolator <sup>c</sup> |
|-------------------------------------------------------|-----------------------------------|------------------------------------|-----------------------------------|
| Particulate matter concentration (mg/m <sup>3</sup> ) | 137.5 ± 7.73                      | 0.075 ± 0.05                       | NM <sup>d</sup>                   |
| Carbon monoxide (ppm)                                 | 0.2 ± 0.13                        | 0.3 ± 0.17                         | NM <sup>d</sup>                   |
| Carbon dioxide (ppm)                                  | 489 ± 24                          | 459 ± 7.01                         | NM <sup>d</sup>                   |
| Temperature (°F)                                      | 74.7 ± 0.28                       | 72.08 ± 0.12                       | 72.08 ± 0.12                      |
| Relative humidity (%)                                 | 29 ± 0.4                          | 33.42 ± 0.26                       | 33.42 ± 0.26                      |

<sup>a</sup> CWCFS, Compressed wood constant feed smoke

<sup>b</sup> Smoke chamber (inside and outside) was monitored every 30 minutes during the entire smoke exposure period. Microisolater was monitored daily every 15 minutes

<sup>c</sup> Values calculated as mean ± SEM.

<sup>d</sup> NM, not measured
